# Supplementary material
Source: publisher figshare collection journal article supplement (https://acs.figshare.com/ndownloader/files/13015364)

**Supporting information**

Docetaxel-Loaded Hyaluronic Acid-Cathepsin B Cleavable Peptide-Gold Nanoparticles for The Treatment of Cancer

Oyuntuya Gotov, Gantumur Battogtokh, Young Tag Ko\*

College of Pharmacy, Gachon University

191 Hambakmoe-ro, Yeonsu-gu, Incheon 406-799, South Korea

\*Corresponding author: College of Pharmacy, Gachon University, 191 Hambakmoe-ro, Yeonsu-gu, Incheon 406-799, South Korea

Tel.: 82-32-899-6417; Fax: 82-32-820-4829; E-mail address: youngtakko@gachon.ac.kr

**Figure S1.** Competition study of HA in MCF-7 cells by confocal microscope.

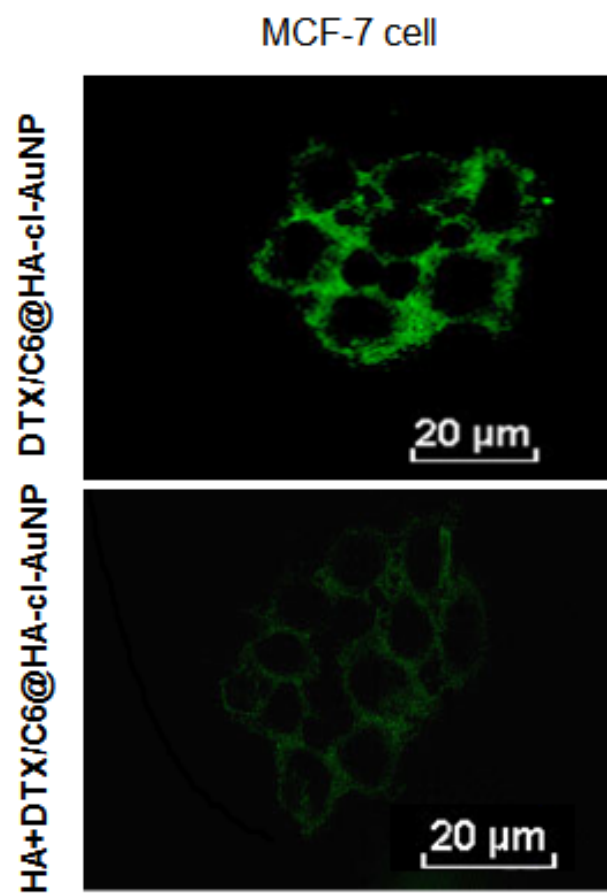

Supplement: Supplementary file 1 [file 13015364]
